# Supplementary material
Source: PubMed Central journal article supplement (PMC5011065)
Supplement: mmc1.pdf [file mmc1.pdf]

**The American Journal of Human Genetics, Volume 99**

## **Supplemental Data**

### **Ancestral Origins and Genetic History of Tibetan Highlanders**

**Dongsheng Lu, Haiyi Lou, Kai Yuan, Xiaoji Wang, Yuchen Wang, Chao Zhang, Yan Lu, Xiong Yang, Lian Deng, Ying Zhou, Qidi Feng, Ya Hu, Qiliang Ding, Yajun Yang, Shilin Li, Li Jin, Yaqun Guan, Bing Su, Longli Kang, and Shuhua Xu**

| Sample ID  | Ethnicity | Sex    | Location  | Sample ID  | Ethnicity | Sex    | Location |
|------------|-----------|--------|-----------|------------|-----------|--------|----------|
| AAGC022151 | Han       | male   | Henan     | AAGC022108 | Tibetan   | female | Chamdo   |
| AAGC022152 | Han       | female | Gansu     | AAGC022109 | Tibetan   | female | Nagqu    |
| AAGC022153 | Han       | female | Xinjiang  | AAGC022110 | Tibetan   | female | Nagqu    |
| AAGC022154 | Han       | female | Henan     | AAGC022111 | Tibetan   | female | Nagqu    |
| AAGC022155 | Han       | female | Xinjiang  | AAGC022112 | Tibetan   | female | Lhasa    |
| AAGC022156 | Han       | female | Shandong  | AAGC022113 | Tibetan   | female | Shigatse |
| AAGC022157 | Han       | female | Gansu     | AAGC022114 | Tibetan   | female | Shigatse |
| AAGC022158 | Han       | male   | Sichuan   | AAGC022107 | Tibetan   | female | Shannan  |
| AAGC022159 | Han       | female | Xinjiang  | AAGC022051 | Tibetan   | female | Shannan  |
| AAGC022160 | Han       | female | Henan     | AAGC022052 | Tibetan   | female | Shigatse |
| AAGC022161 | Han       | male   | Shandong  | AAGC022053 | Tibetan   | female | Shannan  |
| AAGC022162 | Han       | male   | Jiangsu   | AAGC022054 | Tibetan   | female | Shannan  |
| AAGC022163 | Han       | male   | Jiangsu   | AAGC022055 | Tibetan   | female | Shannan  |
| AAGC022164 | Han       | female | Sichuan   | AAGC022056 | Tibetan   | male   | Chamdo   |
| AAGC022165 | Han       | female | Gansu     | AAGC022057 | Tibetan   | male   | Chamdo   |
| AAGC022166 | Han       | female | Sichuan   | AAGC022058 | Tibetan   | male   | Chamdo   |
| AAGC022167 | Han       | female | Henan     | AAGC022059 | Tibetan   | male   | Chamdo   |
| AAGC022168 | Han       | female | Jiangsu   | AAGC022060 | Tibetan   | male   | Chamdo   |
| AAGC022169 | Han       | male   | Gansu     | AAGC022061 | Tibetan   | male   | Lhasa    |
| AAGC022170 | Han       | male   | Shandong  | AAGC022062 | Tibetan   | male   | Lhasa    |
| AAGC022171 | Han       | male   | Anhui     | AAGC022063 | Tibetan   | male   | Shannan  |
| AAGC022172 | Han       | male   | Henan     | AAGC022064 | Tibetan   | male   | Shannan  |
| AAGC022173 | Han       | female | Henan     | AAGC022065 | Tibetan   | male   | Shigatse |
| AAGC022174 | Han       | male   | Sichuan   | AAGC022066 | Tibetan   | male   | Shigatse |
| AAGC022175 | Han       | female | Henan     | AAGC022067 | Tibetan   | male   | Shigatse |
| AAGC022176 | Han       | female | Shandong  | AAGC022068 | Tibetan   | male   | Shigatse |
| AAGC022177 | Han       | female | Henan     | AAGC022069 | Tibetan   | male   | Shigatse |
| AAGC022178 | Han       | male   | Sichuan   | AAGC022070 | Tibetan   | male   | Nyingchi |
| AAGC022179 | Han       | male   | Hubei     | AAGC022071 | Tibetan   | male   | Nyingchi |
| AAGC022180 | Han       | female | Guangdong | AAGC022072 | Sherpa    | male   | Shigatse |
| AAGC022181 | Han       | female | Sichuan   | AAGC022073 | Sherpa    | male   | Shigatse |
| AAGC022182 | Han       | male   | Xinjiang  | AAGC022074 | Sherpa    | female | Shigatse |
| AAGC022183 | Han       | male   | Jiangsu   | AAGC022075 | Sherpa    | female | Shigatse |
| AAGC022184 | Han       | male   | Gansu     | AAGC022076 | Sherpa    | male   | Shigatse |
| AAGC022185 | Han       | male   | Chongqing | AAGC022077 | Tibetan   | male   | Shigatse |
| AAGC022186 | Han       | male   | Henan     | AAGC022078 | Tibetan   | male   | Shigatse |
| AAGC022187 | Han       | male   | Henan     | AAGC022079 | Tibetan   | female | Shigatse |
| AAGC022188 | Han       | male   | Chongqing | AAGC022080 | Tibetan   | female | Shigatse |
| AAGC022189 | Han       | male   | Xinjiang  |            |           |        |          |

**Table S1** Information of the samples for sequencing in this study

| Sample ID  | Ethnicity | Mapped reads  | Read depth | Sample ID  | Ethnicity | Mapped reads  | Read depth |
|------------|-----------|---------------|------------|------------|-----------|---------------|------------|
| AAGC022151 | Han       | 1,591,144,384 | 79.6×      | AAGC022051 | Tibetan   | 749,183,856   | 37.5×      |
| AAGC022152 | Han       | 1,673,465,613 | 83.7×      | AAGC022052 | Tibetan   | 797,679,786   | 39.9×      |
| AAGC022153 | Han       | 1,695,829,400 | 84.8×      | AAGC022053 | Tibetan   | 812,473,983   | 40.6×      |
| AAGC022154 | Han       | 1,691,085,840 | 84.6×      | AAGC022054 | Tibetan   | 806,315,598   | 40.3×      |
| AAGC022155 | Han       | 1,616,239,134 | 80.8×      | AAGC022055 | Tibetan   | 617,510,254   | 30.9×      |
| AAGC022156 | Han       | 1,632,671,866 | 81.6×      | AAGC022056 | Tibetan   | 720,647,639   | 36.0×      |
| AAGC022157 | Han       | 1,692,498,209 | 84.6×      | AAGC022057 | Tibetan   | 731,673,851   | 36.6×      |
| AAGC022158 | Han       | 1,555,333,449 | 77.8×      | AAGC022058 | Tibetan   | 727,579,311   | 36.4×      |
| AAGC022159 | Han       | 812,464,199   | 40.6×      | AAGC022059 | Tibetan   | 651,295,687   | 32.6×      |
| AAGC022160 | Han       | 830,888,051   | 41.5×      | AAGC022060 | Tibetan   | 627,802,914   | 31.4×      |
| AAGC022161 | Han       | 837,055,727   | 41.9×      | AAGC022061 | Tibetan   | 748,037,548   | 37.4×      |
| AAGC022162 | Han       | 831,193,590   | 41.6×      | AAGC022062 | Tibetan   | 682,690,826   | 34.1×      |
| AAGC022163 | Han       | 842,546,144   | 42.1×      | AAGC022063 | Tibetan   | 740,232,029   | 37.0×      |
| AAGC022164 | Han       | 839,036,197   | 42.0×      | AAGC022064 | Tibetan   | 833,814,794   | 41.7×      |
| AAGC022165 | Han       | 833,031,290   | 41.7×      | AAGC022065 | Tibetan   | 827,002,773   | 41.4×      |
| AAGC022166 | Han       | 823,596,584   | 41.2×      | AAGC022066 | Tibetan   | 782,327,372   | 39.1×      |
| AAGC022167 | Han       | 822,539,963   | 41.1×      | AAGC022067 | Tibetan   | 761,167,865   | 38.1×      |
| AAGC022168 | Han       | 841,427,099   | 42.1×      | AAGC022068 | Tibetan   | 793,520,776   | 39.7×      |
| AAGC022169 | Han       | 819,660,225   | 41.0×      | AAGC022069 | Tibetan   | 796,307,201   | 39.8×      |
| AAGC022170 | Han       | 841,146,434   | 42.1×      | AAGC022070 | Tibetan   | 801,217,703   | 40.1×      |
| AAGC022171 | Han       | 843,735,336   | 42.2×      | AAGC022071 | Tibetan   | 806,962,026   | 40.3×      |
| AAGC022172 | Han       | 842,541,191   | 42.1×      | AAGC022072 | Sherpa    | 782,905,194   | 39.1×      |
| AAGC022173 | Han       | 832,455,997   | 41.6×      | AAGC022073 | Sherpa    | 761,382,444   | 38.1×      |
| AAGC022174 | Han       | 791,968,738   | 39.6×      | AAGC022074 | Sherpa    | 752,908,895   | 37.6×      |
| AAGC022175 | Han       | 757,869,466   | 37.9×      | AAGC022075 | Sherpa    | 738,558,824   | 36.9×      |
| AAGC022176 | Han       | 790,897,953   | 39.5×      | AAGC022076 | Sherpa    | 750,982,567   | 37.5×      |
| AAGC022177 | Han       | 801,776,959   | 40.1×      | AAGC022077 | Tibetan   | 712,250,441   | 35.6×      |
| AAGC022178 | Han       | 779,127,405   | 39.0×      | AAGC022078 | Tibetan   | 787,354,852   | 39.4×      |
| AAGC022179 | Han       | 797,138,859   | 39.9×      | AAGC022079 | Tibetan   | 768,522,496   | 38.4×      |
| AAGC022180 | Han       | 779,907,616   | 39.0×      | AAGC022080 | Tibetan   | 773,418,725   | 38.7×      |
| AAGC022181 | Han       | 806,697,742   | 40.3×      | AAGC022107 | Tibetan   | 695,413,410   | 34.8×      |
| AAGC022182 | Han       | 770,819,826   | 38.5×      | AAGC022108 | Tibetan   | 1,485,808,123 | 73.8×      |
| AAGC022183 | Han       | 733,161,684   | 36.7×      | AAGC022109 | Tibetan   | 1,552,598,646 | 76.6×      |
| AAGC022184 | Han       | 754,995,394   | 37.7×      | AAGC022110 | Tibetan   | 1,560,413,927 | 76.8×      |
| AAGC022185 | Han       | 685,607,075   | 34.3×      | AAGC022111 | Tibetan   | 1,471,230,647 | 72.3×      |
| AAGC022186 | Han       | 693,816,750   | 34.7×      | AAGC022112 | Tibetan   | 1,528,021,903 | 74.8×      |
| AAGC022187 | Han       | 610,984,692   | 30.5×      | AAGC022113 | Tibetan   | 1,524,930,381 | 74.8×      |
| AAGC022188 | Han       | 691,654,456   | 34.6×      | AAGC022114 | Tibetan   | 1,533,664,538 | 75.4×      |
| AAGC022189 | Han       | 694,617,260   | 34.7×      |            |           |               |            |

**Table S2** Summary statistics of NGS data of TIB and HAN samples

| Continent region ID | # of Populations (simple ID) | Sample size |
|---------------------|------------------------------|-------------|
| Africa              | 49                           | 535         |
| WestEurasia         | 60                           | 781         |
| SouthAsia           | 22                           | 280         |
| CentralAsiaSiberia  | 23                           | 266         |
| EastAsia            | 22                           | 243         |
| Oceania             | 3                            | 27          |
| America             | 24                           | 213         |
| Total               | 203                          | 2,345       |

**Table S3** Number of HuOrigin populations included in this study

**Note:** HuOrigin, Affymetrix human Origins genotyping dataset for modern human. We used the 'Simple population ID' instead of the 'Verbose population ID' to assign the population ID for each individual.

| <b>Y Chromosome Haplogroup</b> | <b>HAN (%) 20</b> | <b>TBN (%) 18</b> | <b>SHP (%) 3</b> |
|--------------------------------|-------------------|-------------------|------------------|
| C3f                            | 1 (5.00)          | 0 (0.00)          | 0 (0.00)         |
| C3f1                           | 2 (10.00)         | 0 (0.00)          | 0 (0.00)         |
| D1a                            | 0 (0.00)          | 8 (44.44)         | 0 (0.00)         |
| D3a                            | 0 (0.00)          | 4 (22.22)         | 1 (33.33)        |
| N                              | 2 (10.00)         | 1 (5.56)          | 0 (0.00)         |
| N1b                            | 1 (5.00)          | 0 (0.00)          | 0 (0.00)         |
| N1c1                           | 0 (0.00)          | 1 (5.56)          | 0 (0.00)         |
| O1a                            | 1 (5.00)          | 0 (0.00)          | 0 (0.00)         |
| O1a1                           | 1 (5.00)          | 0 (0.00)          | 0 (0.00)         |
| O2a1                           | 2 (10.00)         | 0 (0.00)          | 0 (0.00)         |
| O2a1a                          | 1 (5.00)          | 0 (0.00)          | 0 (0.00)         |
| O3a1c1                         | 2 (10.00)         | 0 (0.00)          | 0 (0.00)         |
| O3a2b1                         | 1 (5.00)          | 0 (0.00)          | 0 (0.00)         |
| O3a2c                          | 4 (20.00)         | 0 (0.00)          | 0 (0.00)         |
| O3a2c1a                        | 0 (0.00)          | 4 (22.22)         | 1 (33.33)        |
| O3a2c2                         | 1 (5.00)          | 0 (0.00)          | 0 (0.00)         |
| Q1a1a1                         | 1 (5.00)          | 0 (0.00)          | 0 (0.00)         |
| R1a1a1b2a1a                    | 0 (0.00)          | 0 (0.00)          | 1 (33.33)        |

**Table S5** Distribution of Y chromosome haplogroups in the three populations

| MtDNA Haplogroup | HAN (%) 39 | TBN (%) 33 | SHP (%) 5 |
|------------------|------------|------------|-----------|
| A                | 3 (7.69)   | 3 (9.09)   | 2 (40.00) |
| B4               | 2 (5.13)   | 1 (3.03)   | 0 (0.00)  |
| B5               | 4 (10.26)  | 0 (0.00)   | 0 (0.00)  |
| C*               | 1 (2.56)   | 0 (0.00)   | 0 (0.00)  |
| C4               | 1 (2.56)   | 4 (12.12)  | 1 (20.00) |
| C5               | 0 (0.00)   | 1 (3.03)   | 0 (0.00)  |
| C7               | 3 (7.69)   | 0 (0.00)   | 0 (0.00)  |
| D4               | 7 (17.95)  | 3 (9.09)   | 0 (0.00)  |
| D5               | 0 (0.00)   | 1 (3.03)   | 0 (0.00)  |
| F1               | 3 (7.69)   | 3 (9.09)   | 0 (0.00)  |
| F2               | 1 (2.56)   | 1 (3.03)   | 0 (0.00)  |
| F3               | 2 (5.13)   | 0 (0.00)   | 0 (0.00)  |
| G2               | 1 (2.56)   | 2 (6.06)   | 0 (0.00)  |
| G3               | 1 (2.56)   | 1 (3.03)   | 0 (0.00)  |
| M10              | 3 (7.69)   | 0 (0.00)   | 0 (0.00)  |
| M13              | 0 (0.00)   | 4 (12.12)  | 0 (0.00)  |
| M5               | 0 (0.00)   | 0 (0.00)   | 1 (20.00) |
| M62              | 0 (0.00)   | 1 (3.03)   | 0 (0.00)  |
| M8               | 1 (2.56)   | 0 (0.00)   | 0 (0.00)  |
| M9               | 0 (0.00)   | 6 (18.18)  | 1 (20.00) |
| N9               | 2 (5.13)   | 0 (0.00)   | 0 (0.00)  |
| R                | 3 (7.69)   | 0 (0.00)   | 0 (0.00)  |
| Y                | 3 (7.69)   | 0 (0.00)   | 0 (0.00)  |
| Z                | 0 (0.00)   | 2 (6.06)   | 0 (0.00)  |

**Table S6** Distribution of mtDNA haplogroups in the three populations

| Population ID    | $F_{ST}$ | Population ID    | $F_{ST}$     | Population ID   | $F_{ST}$     | Population ID  | $F_{ST}$     | Population ID | $F_{ST}$     |
|------------------|----------|------------------|--------------|-----------------|--------------|----------------|--------------|---------------|--------------|
| AA               | 0.151    | Dinka            | 0.177        | Kalash          | 0.103        | Nogais         | 0.064        | Turkish       | 0.086        |
| Abkhasians       | 0.102    | Druze            | 0.105        | Kalmyks         | 0.018        | NorthOssetians | 0.091        | Turkish_Jew   | 0.104        |
| Adyghe           | 0.095    | Egyptians        | 0.098        | Kaqchikel       | 0.099        | Norwegian      | 0.105        | Turkmens      | 0.056        |
| Albanian         | 0.105    | English          | 0.106        | Karitiana       | 0.162        | Ojibwa         | 0.073        | Tuscany       | 0.106        |
| Aleutian         | 0.071    | Esan             | 0.184        | Kgalagadi       | 0.203        | Onge           | 0.142        | Tuvinian      | 0.024        |
| Algerian         | 0.116    | Eskimo           | 0.074        | Kharia          | 0.056        | Orcadians      | 0.107        | Ukrainians    | 0.103        |
| Algonquin        | 0.107    | Estonians        | 0.103        | Khomani         | 0.203        | Oroqens        | 0.018        | Ulchi         | 0.031        |
| Altaians         | 0.025    | Ethiopian_Jews   | 0.117        | Khwe            | 0.187        | Palestinians   | 0.099        | Uygurs        | 0.030        |
| Ami              | 0.047    | Evens            | 0.033        | Kinh            | 0.022        | Papuan         | 0.167        | Uzbeks        | 0.044        |
| Armenians        | 0.102    | Finnish          | 0.098        | Korean          | 0.012        | Pathans        | 0.076        | Vishwabrahmin | 0.066        |
| Ashkenazy_Jews   | 0.105    | French           | 0.103        | Koryaks         | 0.070        | Pima           | 0.128        | Wambo         | 0.186        |
| Atayal           | 0.069    | French_South     | 0.110        | Kumyks          | 0.092        | Punjabi        | 0.070        | Xibo          | 0.012        |
| Aymara           | 0.107    | Gambian          | 0.181        | Kusunda         | 0.037        | Quechua        | 0.099        | Xuun          | 0.217        |
| Balkars          | 0.090    | Gana             | 0.211        | Kyrgyzians      | 0.023        | Russians_North | 0.091        | Yakuts        | 0.032        |
| Balochi          | 0.084    | Georgian_Jews    | 0.107        | Lahu            | 0.032        | Saharawi       | 0.118        | Yemenese      | 0.100        |
| BantuKenya       | 0.177    | Georgians        | 0.105        | Lebanese        | 0.101        | Sandawe        | 0.144        | Yemenite_Jews | 0.113        |
| BantuSouthAfrica | 0.182    | Greek            | 0.102        | Lezgins         | 0.098        | Sardinian      | 0.116        | <b>Yizu</b>   | <b>0.007</b> |
| Basque           | 0.112    | Guarani          | 0.108        | Libyan_Jew      | 0.110        | Saudis         | 0.111        | Yoruba        | 0.170        |
| BedouinA         | 0.098    | Gui              | 0.241        | Lithuanians     | 0.108        | Scottish       | 0.109        | Yukaghirs     | 0.036        |
| BedouinB         | 0.120    | GujaratiA        | 0.077        | Lodhi           | 0.068        | She            | 0.023        | Zapotec       | 0.100        |
| Belarusians      | 0.103    | GujaratiB        | 0.074        | Luhya           | 0.172        | Shua           | 0.185        |               |              |
| Bengali          | 0.058    | GujaratiC        | 0.074        | Luo             | 0.173        | Sicilian       | 0.103        |               |              |
| BiakaPygmy       | 0.201    | GujaratiD        | 0.075        | Makrani         | 0.088        | Sindhi         | 0.075        |               |              |
| Bolivian         | 0.097    | <b>HAN</b>       | <b>0.011</b> | Mala            | 0.066        | Somali         | 0.125        |               |              |
| Bougainville     | 0.131    | Hadza            | 0.193        | Maltese         | 0.105        | Spanish        | 0.102        |               |              |
| Brahui           | 0.086    | Haiom            | 0.193        | Mandenka        | 0.177        | Spanish_North  | 0.112        |               |              |
| Bulgarians       | 0.102    | Han              | 0.015        | Mansi           | 0.058        | Surui          | 0.172        |               |              |
| Burusho          | 0.065    | <b>Han_North</b> | <b>0.010</b> | Masai           | 0.140        | Syrians        | 0.102        |               |              |
| Cabecar          | 0.162    | Hazara           | 0.033        | Maya            | 0.098        | TIB            | 0.000        |               |              |
| Cambodian        | 0.026    | Hezhens          | 0.017        | MbutiPygmy      | 0.230        | Taa_East       | 0.238        |               |              |
| Chechens         | 0.098    | Hoan             | 0.235        | Mende           | 0.182        | Taa_North      | 0.242        |               |              |
| Chipewyan        | 0.091    | Hungarians       | 0.101        | Miaozi          | 0.018        | Taa_West       | 0.241        |               |              |
| Chukchis         | 0.065    | Icelandic        | 0.107        | Mixe            | 0.118        | Tajiks_Pamir   | 0.083        |               |              |
| Chuvashes        | 0.073    | Iranian_Jews     | 0.106        | Mixtec          | 0.105        | Thai           | 0.028        |               |              |
| Cochin_Jews      | 0.080    | Iranians         | 0.092        | <b>Mongolas</b> | <b>0.010</b> | Tiwari         | 0.070        |               |              |
| Cree             | 0.074    | Iraqi_Jews       | 0.108        | Mordovians      | 0.094        | Tshwa          | 0.215        |               |              |
| Croatian         | 0.104    | Italian_North    | 0.107        | Moroccan_Jews   | 0.107        | Tswana         | 0.190        |               |              |
| Cypriots         | 0.106    | Itelmen          | 0.073        | Mozabites       | 0.111        | <b>Tu</b>      | <b>0.006</b> |               |              |
| Czech            | 0.104    | Japanese         | 0.018        | Nama            | 0.186        | Tubalar        | 0.044        |               |              |
| Dai              | 0.026    | Jordanians       | 0.100        | Naro            | 0.238        | Tujia          | 0.013        |               |              |
| Damara           | 0.188    | Ju_hoan_North    | 0.245        | <b>Naxi</b>     | <b>0.009</b> | Tunisian       | 0.103        |               |              |
| Daur             | 0.015    | Ju_hoan_South    | 0.248        | Nganasans       | 0.066        | Tunisian_Jew   | 0.111        |               |              |

**Table S7** Estimation of  $F_{ST}$  between TIB and worldwide populations

| chr | start    | end      | Length(kb)*** | Genes                     | Ancestry      | Tibetan frequency* | Supporting methods** |
|-----|----------|----------|---------------|---------------------------|---------------|--------------------|----------------------|
| 2   | 46566351 | 46600894 | 34.5          | <i>EPAS1</i>              | Denisovan     | 0.855              | A,E,S,CP             |
| 2   | 46600895 | 46673393 | 72.5          | <i>EPAS1,LOC101805491</i> | Ust'-Ishim    | 0.842              | A,CP                 |
| 2   | 46673394 | 46719121 | 45.7          | <i>TMEM247</i>            | Denisovan     | 0.763              | A,E,S,CP             |
| 2   | 46719122 | 46728427 | 9.3           | .                         | Neanderthal   | 0.763              | CP                   |
| 2   | 46728428 | 46742298 | 13.9          | <i>ATP6V1E2</i>           | Ust'-Ishim    | 0.737              | CP                   |
| 2   | 46742299 | 46749337 | 7.0           | <i>ATP6V1E2</i>           | Denisovan     | 0.737              | CP                   |
| 2   | 46749338 | 46759493 | 10.2          | .                         | Neanderthal   | 0.737              | CP                   |
| 2   | 46759494 | 46772998 | 13.5          | <i>RHOQ</i>               | Denisovan     | 0.724              | E,CP                 |
| 2   | 46772999 | 46818801 | 45.8          | <i>RHOQ,LOC100506142</i>  | Denisovan/Han | 0.368/0.605        | A,E,S,CP             |
| 2   | 46818802 | 46873937 | 55.1          | <i>PIGF,CRIPT</i>         | Denisovan     | 0.605              | A,E,S,CP             |

**Table S16 Ancestry inference of *EPAS1* and its downstream region in Tibetan population.**

\* The Tibetan frequency here refers to the maximum Tibetan frequency with the corresponding ancestry in the region.

\*\* A, ArchaicSeeker; S, *S\**; E, *E-allele*; CP, ChromoPainter.

\*\*\* The boundary of each region was determined manually: some of the small segments (<1 kb) with different ancestry from flanking region was removed and also the 'unknown' region was filled by its most likely neighbouring ancestry.



| Haplotype | Start    | End      | size(kb) | Sample<br>size | TMRCA       | $T_{D(\text{Den})}$ | $T_{D(\text{Nean})}$ |
|-----------|----------|----------|----------|----------------|-------------|---------------------|----------------------|
| new       | 46577796 | 46870806 | 293.0    | 23             | 38.4 ± 13.0 | 944 ± 14            | 1,178 ± 88           |
| old       | 46577796 | 46870806 | 293.0    | 17             | 62.2 ± 17.6 | 868 ± 16            | 1,222 ± 92           |

**Table S17** TMRCA and divergence time of major Tibetan haplotypes

The time estimation in the table are in thousand year (kya). A slow mutation rate of  $0.5 \times 10^{-9}$  per site per year was assumed.  $T_{D(\text{Den})}$ : Divergence time between TIB's haplotypes and Denisovan's sequences;  $T_{D(\text{Nean})}$ : Divergence time between TIB's haplotypes and Neanderthal's sequences; Sample size: number of haplotypes with corresponding haplotypes (new and old see definition in maintext Figure 7) at the 293kb region..

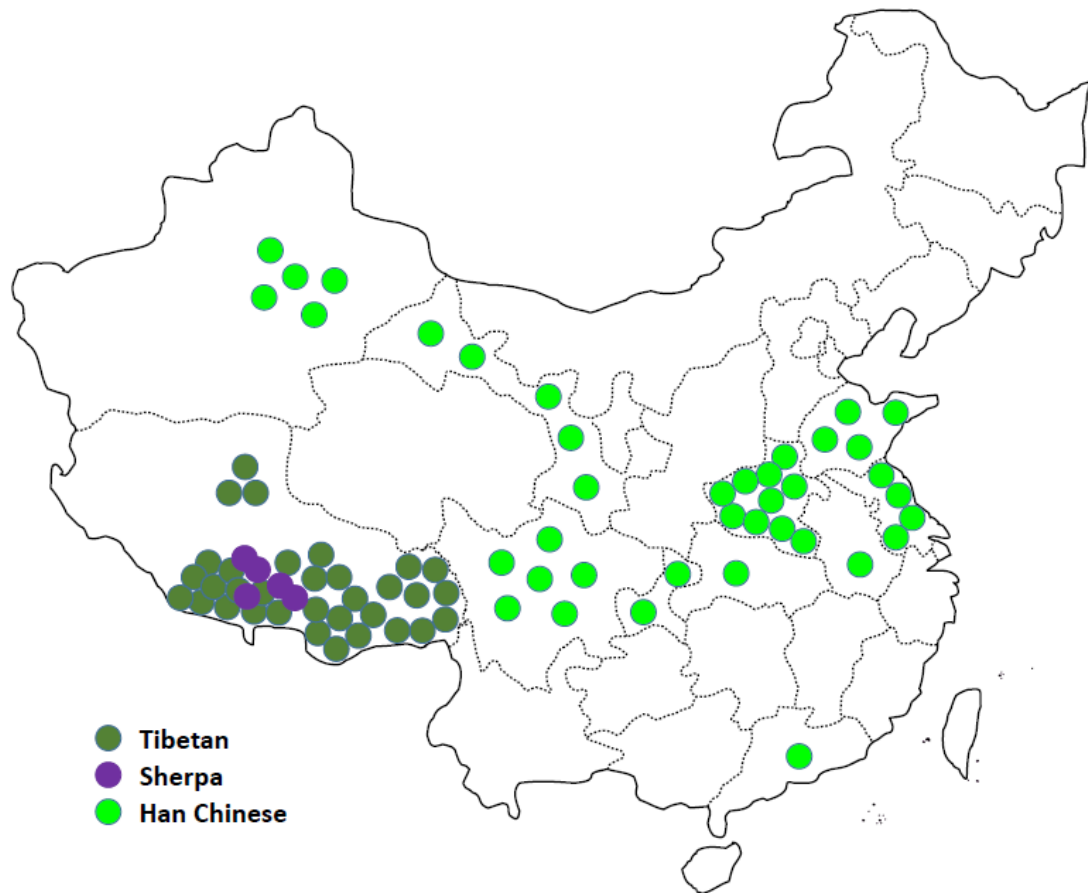

**Figure S1** Geographical distribution of Tibetan, Sherpa and Han Chinese samples.

Showing here are the rough locations of the individuals with genomes sequenced in this study. The 33 Tibetan and 5 Sherpa samples were collected from six prefectures (Lhasa, Chamdo, Nagqu, Nyingchi, Shannan, and Shigatse) in the Tibet Autonomous Region. The 39 Han Chinese samples were collected from 10 regions in China (see Table S1 for more details).



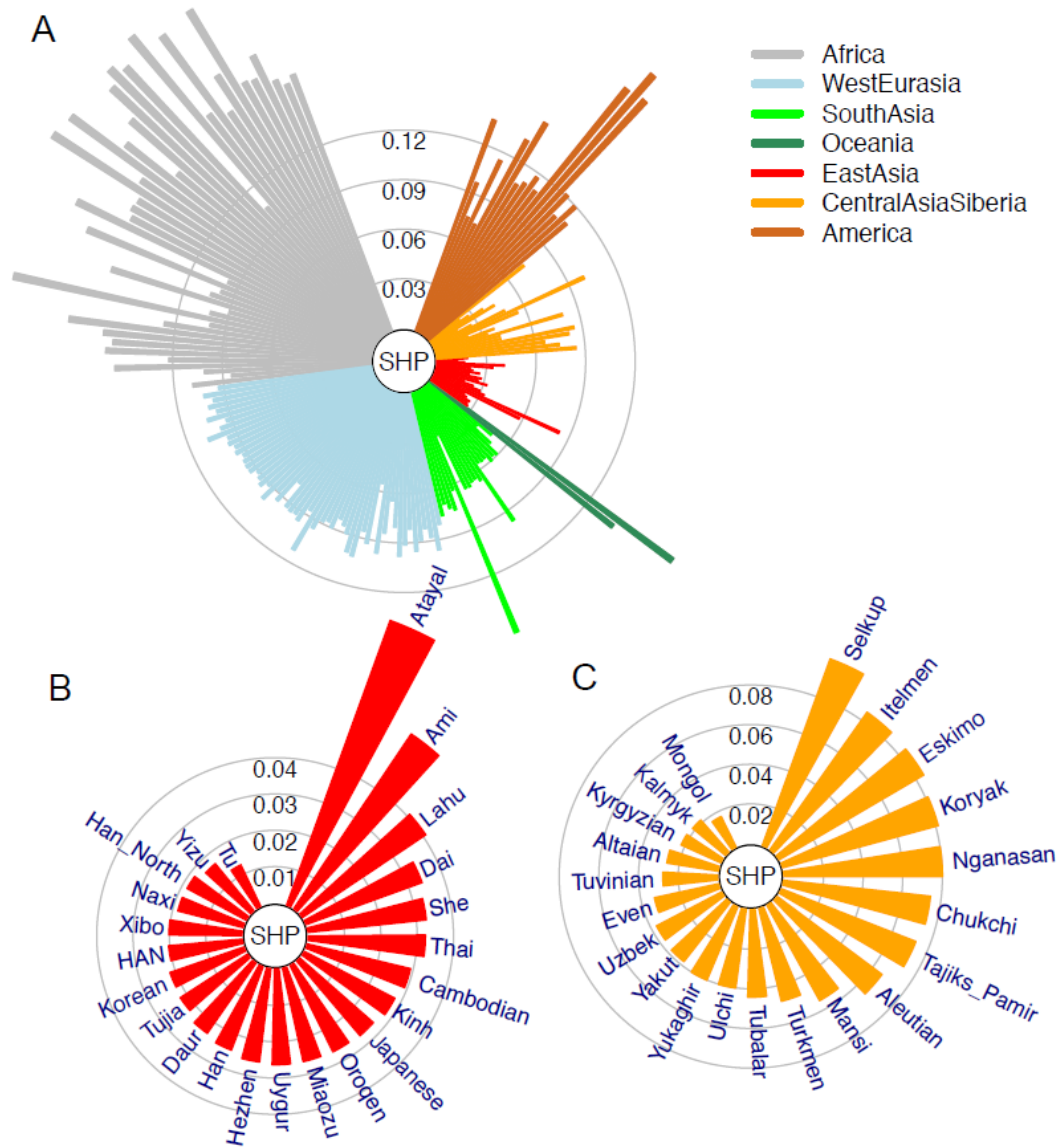

**Figure S3 Genetic affinities of SHP in the context of worldwide populations.**

**a.** a fan-like chart showing genetic difference ( $F_{ST}$ ) between SHP and worldwide populations. Each branch represent a comparison between SHP and one of the 256 populations and the length is proportional to the  $F_{ST}$  value as indicated in grey circles. The populations are classified by geographical regions and indicated with colors as shown in the legend. The populations in each region are presented in a clockwise order according to great-circle distance to the Tibet. **b.** a fan-like chart showing  $F_{ST}$  between SHP and East Asian populations. **c.** a fan-like chart showing  $F_{ST}$  between SHP and Central Asian/Siberian populations.

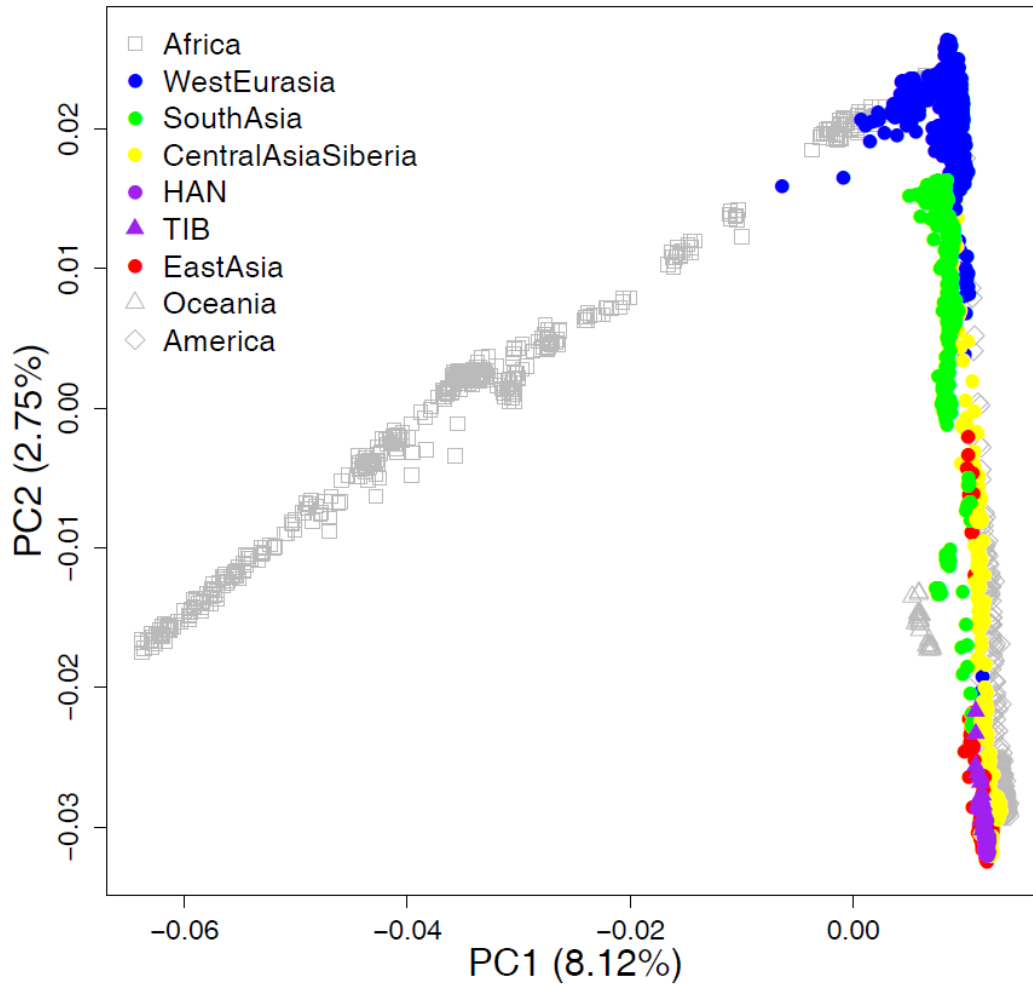

**Figure S4 Principal component analysis (PCA) of TIB and HAN Individuals and world-wide population samples.**

Analysis of the first two principal components of TIB individuals and world-wide population samples which consist of 2,035 Human Origin samples; Geographical regions where the individuals are located are indicated with colors as shown in the legend. Numbers in brackets denote variance explained by each principal component (PC).

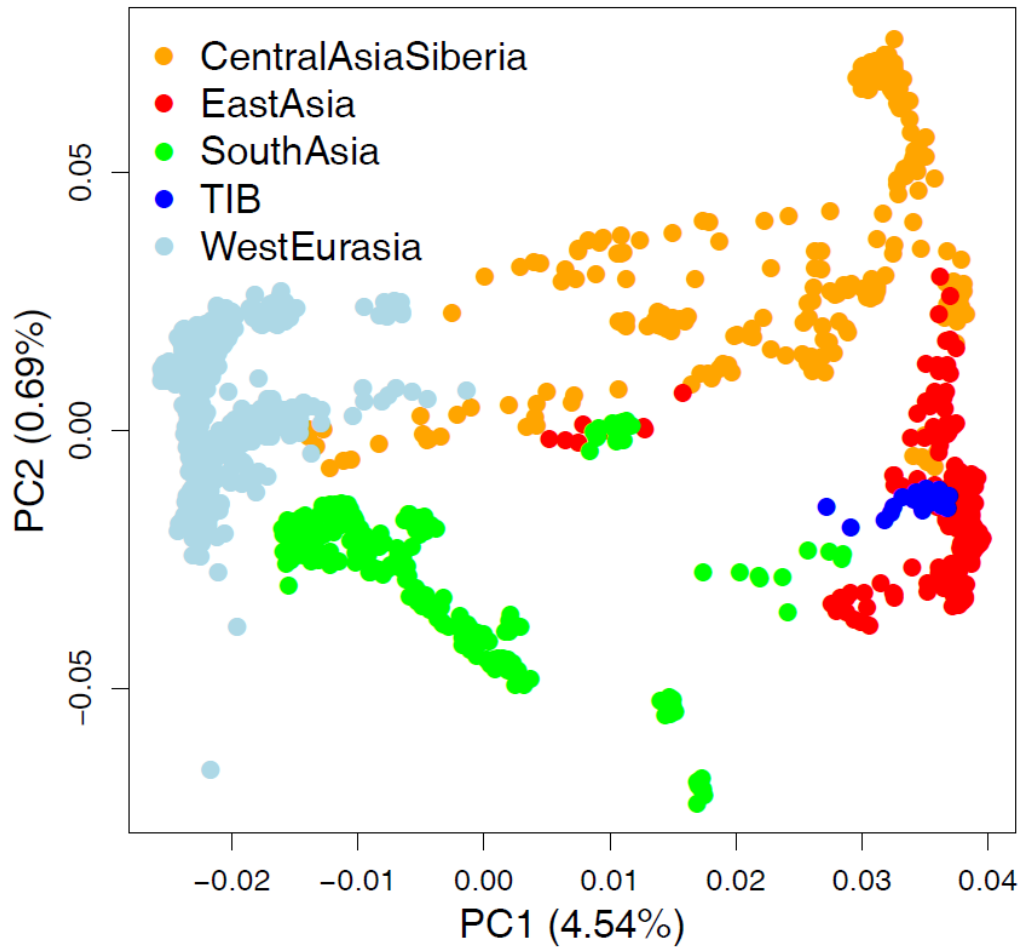

**Figure S5** PCA of TIB Individuals and non-African samples (with Oceanian samples excluded).

Analysis of the first two principal components of TIB individuals and non-African samples (with Oceanian samples excluded); Geographical regions where the individuals are located are indicated with colors as shown in the legend. Numbers in brackets denote variance explained by each PC.

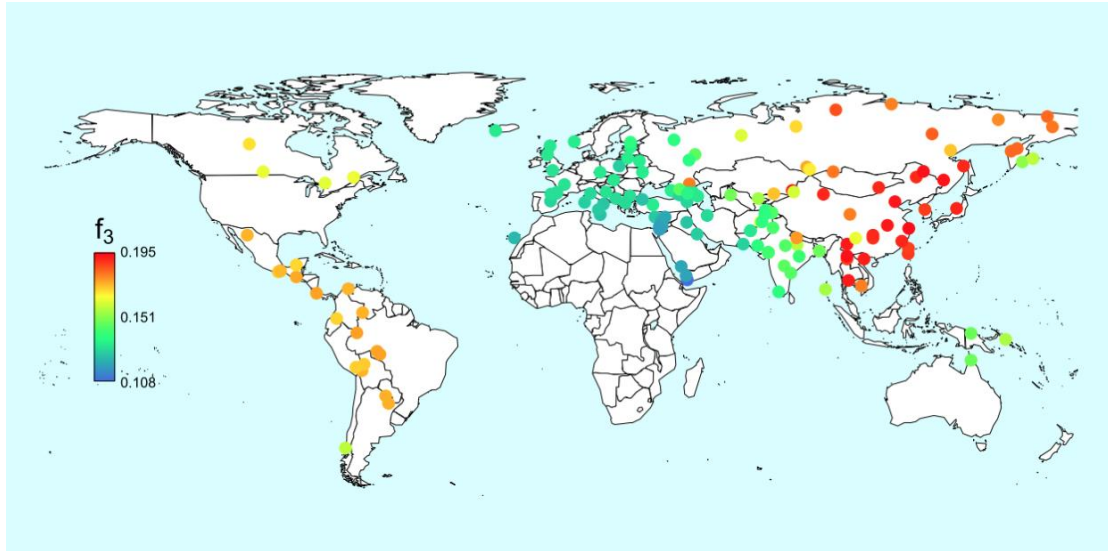

**Figure S6** Heat map of outgroup  $f_3$  statistics testing for relatedness of non-African populations to TIB.

The values shown here are based on computing  $f_3(\text{African}; \text{TIB}, X)$ , where X is a non-African population. A warmer color denotes a higher  $f_3$  value, which indicates population X shared greater drift with Tibetan derived from African and suggests a closer relationship to TIB. For list of population labels, see [Table S4](#).

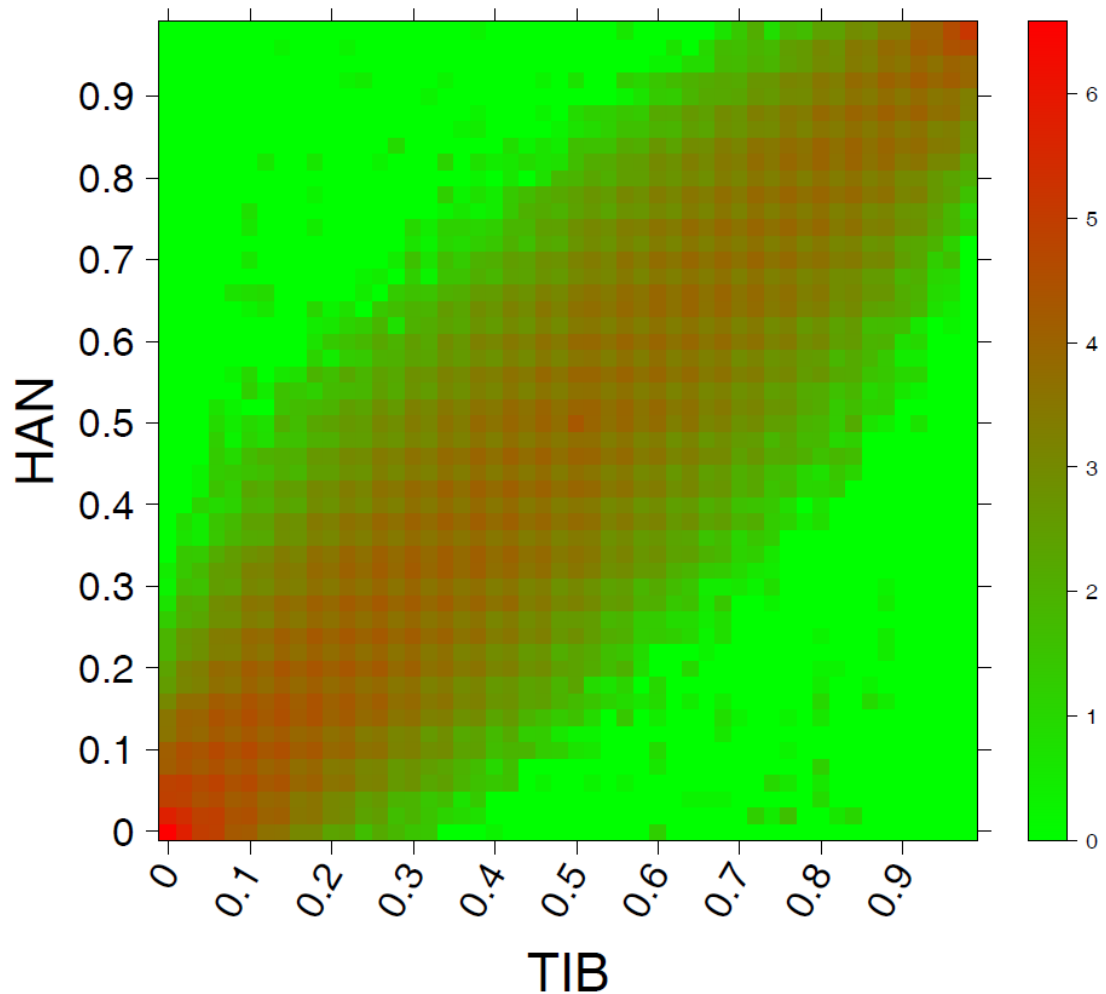

**Figure S7** Correlation of derived allele frequency between TIB and HAN.

For each polymorphic SNV we calculated the allele frequency of the derived allele in both TIB and HAN. The color in each bin represents the number of SNPs that display each given set of derived allele frequencies. The light green regions show that very few SNVs with derived allele in high frequency in TIB but in low frequency in HAN, or vice versa. The red regions show that there are many SNVs that have similar low derived allele frequencies in both TIB and HAN. The right legend with color coding for the number of SNVs in log scale with warmer color indicating larger number of SNVs.



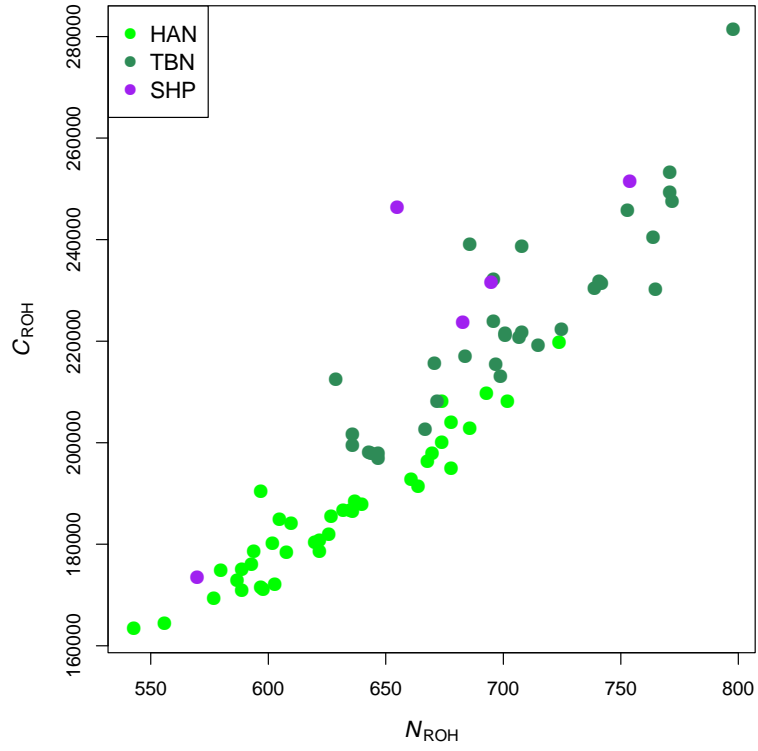

**Figure S8** Distribution of number of ROH ( $N_{ROH}$ ) per individual and cumulative length of ROH ( $C_{ROH}$ ) in TBN, SHP and HAN.

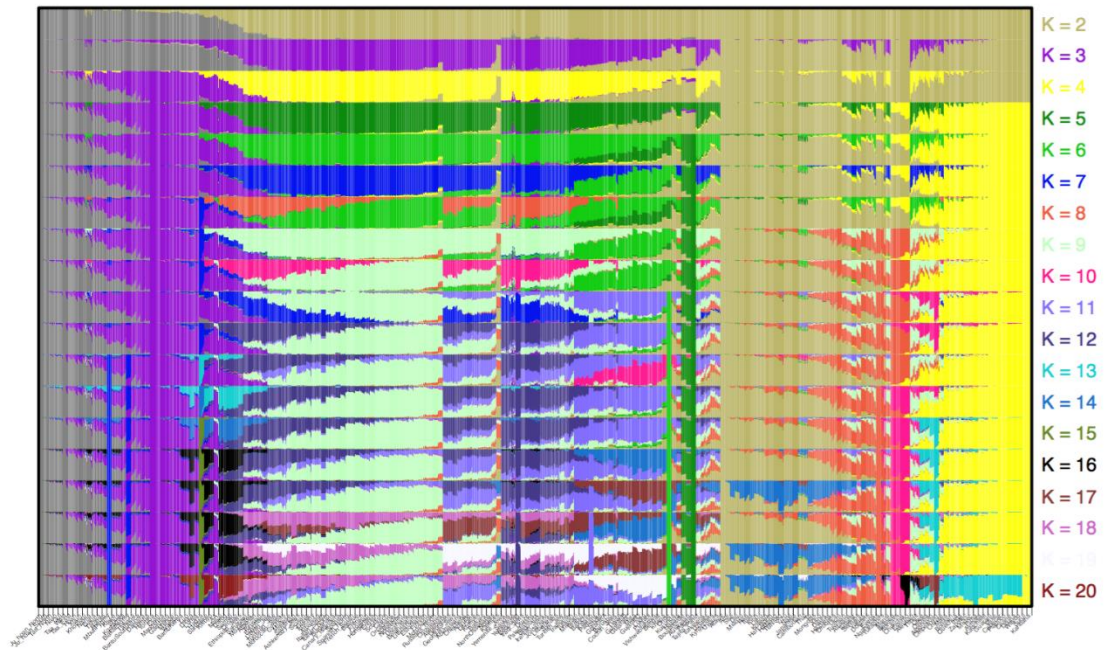

**Figure S9 Summary plot of genetic admixture of worldwide populations.**

The results of individual admixture proportions estimated from 288,979 SNPs with genotype data available for 38 TIB, 39 HAN and 2,345 HuOrigin samples. Each individual is represented by a single vertical line broken into K colored segments, with lengths proportional to each of the K inferred clusters, where the K values are shown in the legend. The predefined populations IDs are presented at the bottom of the plot, the geographic region of each population is shown on the top of the plot.

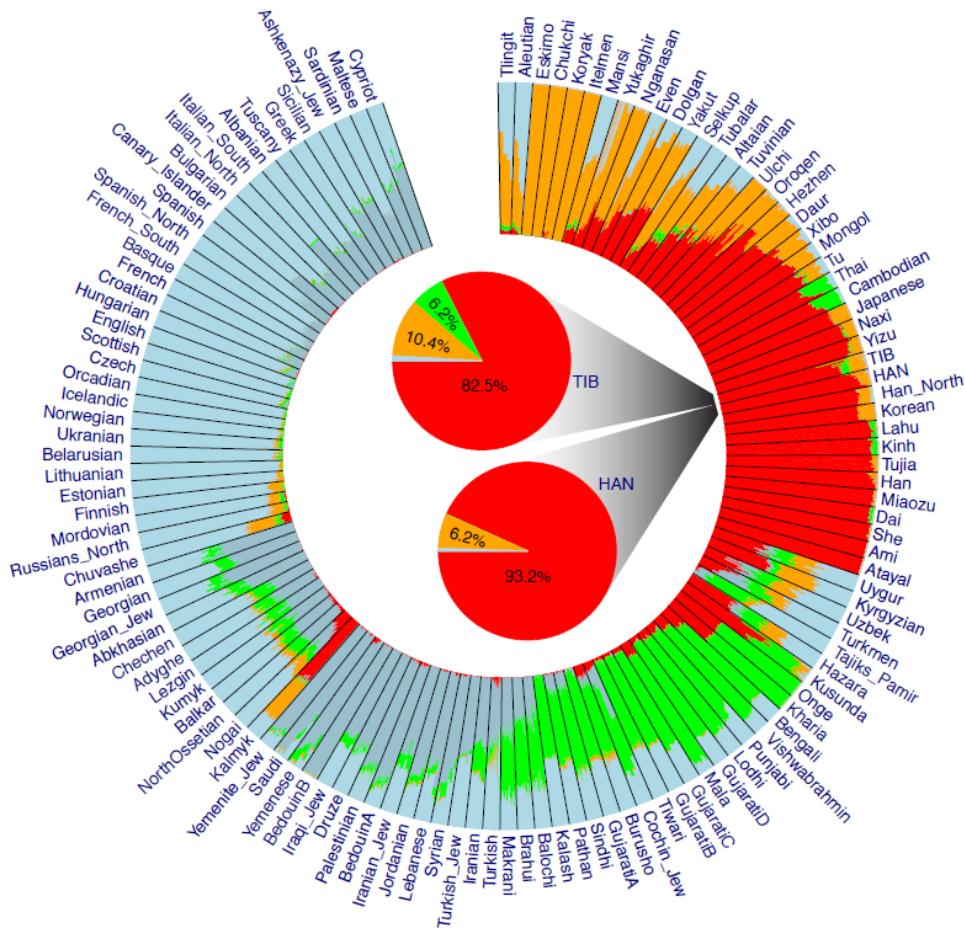

**Figure S10 Summary plot of genetic admixture (with Oceanian and American samples excluded).**

The results of individual admixture proportions estimated from 592,799 autosomal SNPs with genotype data available for 38 TIB, 39 HAN and 2,345 HuOrigin samples (African, American and Oceanian samples were not included). Each individual is represented by a single line broken into  $K = 5$  colored segments, with lengths proportional to the  $K = 5$  inferred clusters. The population IDs are presented outside of the circle of the plot. The results of population level admixture of TIB and HAN are further summarized and displayed in the two pie-charts in the center of the circle plot with admixture proportion denoted in percentage.

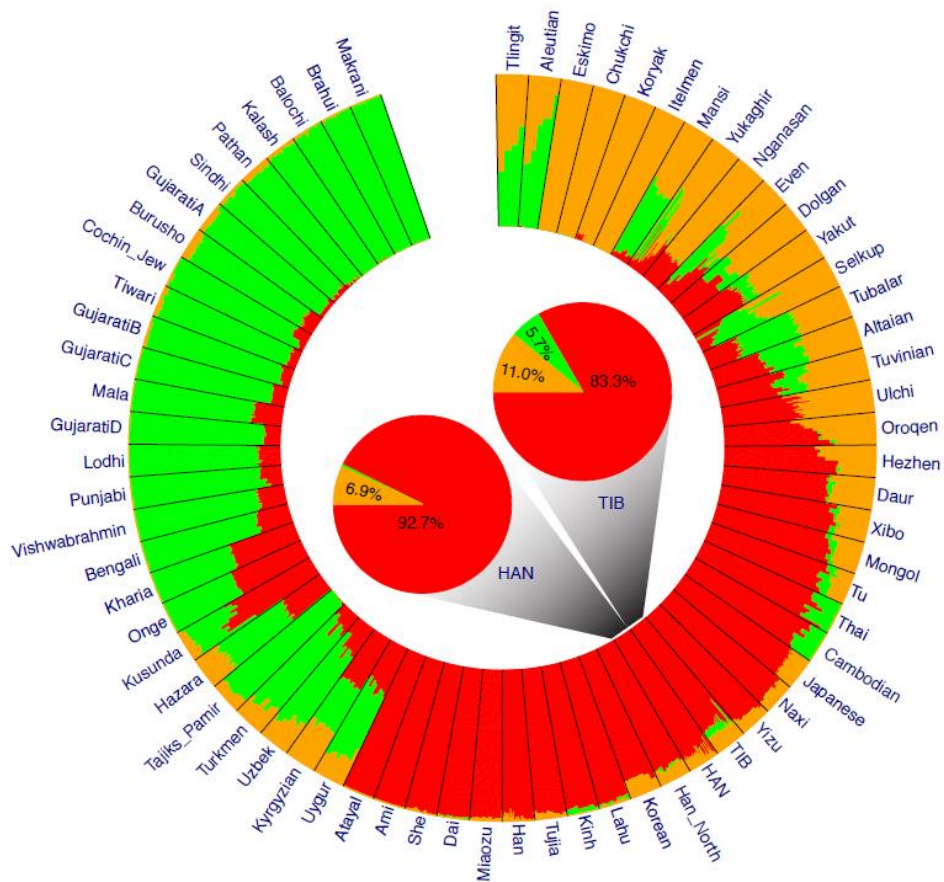

**Figure S11 Summary plot of genetic admixture (with western Eurasian samples excluded).**

The results of individual admixture proportions estimated from 592,799 SNPs with genotype data available for 38 TIB, 39 HAN and 2,345 HuOrigin samples (African, American, Oceanian and western Eurasian samples were not included). Each individual is represented by a single line broken into  $K = 3$  colored segments, with lengths proportional to the  $K = 3$  inferred clusters. The population IDs are presented outside of the circle of the plot. The results of population level admixture of TIB and HAN are further summarized and displayed in the two pie-charts in the center of the circle plot with admixture proportion denoted in percentage.

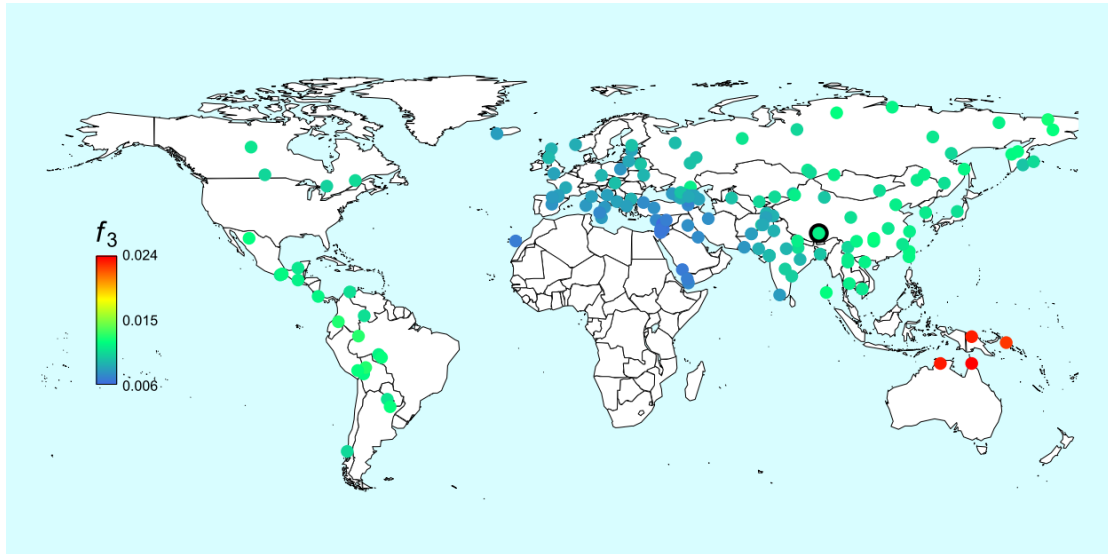

**Figure S12** Heat map of outgroup  $f_3$  statistics testing for relatedness of non-African populations to Neanderthal.

The values showing here are based on computing  $f_3(\text{African}; \text{Neanderthal}, X)$ , where  $X$  is a non-African population. A warmer color indicates a higher  $f_3$  value, which suggests greater derived allele sharing between population  $X$  and Neanderthal genome. TIB is highlighted with a black circle. For list of population labels, see [Table S4](#).

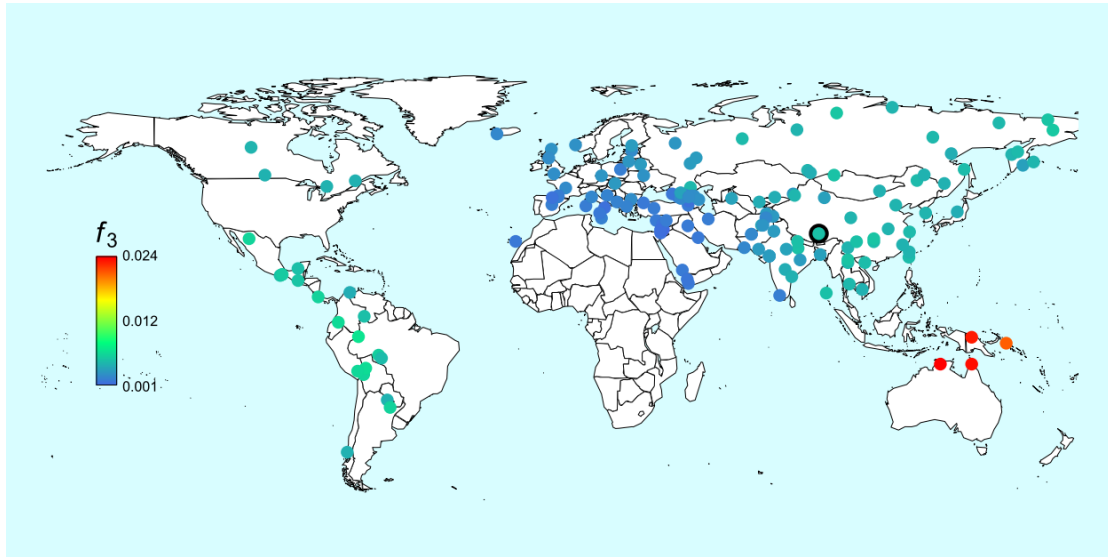

**Figure S13** Heat map of outgroup  $f_3$  statistics testing for relatedness of non-African populations to Denisovan.

The values showing here are based on computing  $f_3(\text{African}; \text{Denisovan}, X)$ , where  $X$  is a non-African population. A warmer color indicates a higher  $f_3$  value, which suggests greater derived allele sharing between population  $X$  and Denisovan genome. TIB is highlighted with a black circle. For list of population labels, see [Table S4](#).

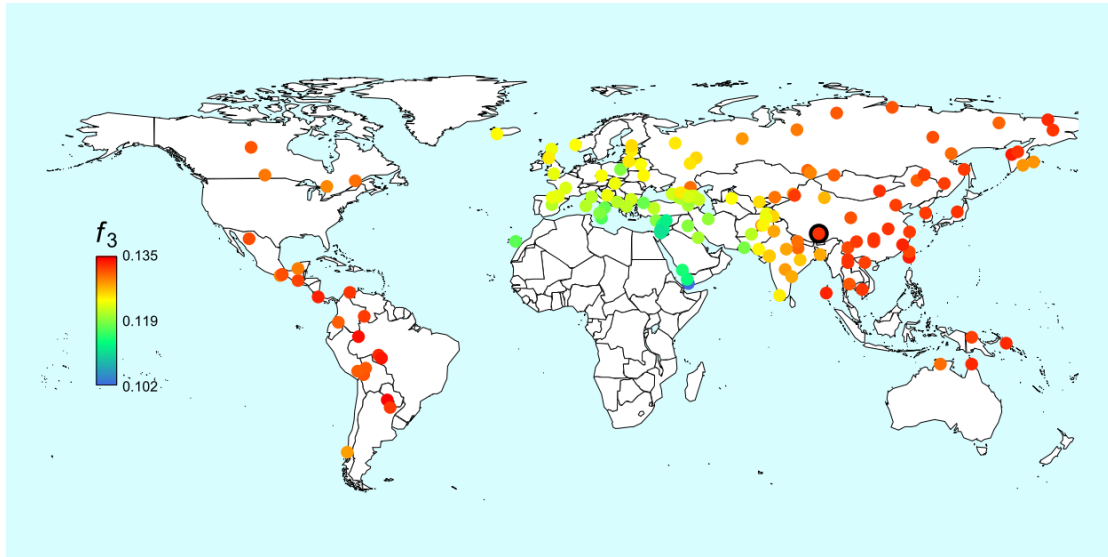

**Figure S14** Heat map of outgroup  $f_3$  statistics testing for relatedness of non-African populations to Ust'-Ishim.

The values showing here are based on computing  $f_3(\text{African}; \text{Ust}'\text{-Ishim}, X)$ , where  $X$  is a non-African population. A warmer color indicates a higher  $f_3$  value, which suggests greater derived allele sharing between population  $X$  and Ust'-Ishim genome. TIB is highlighted with a black circle. For list of population labels, see [Table S4](#).

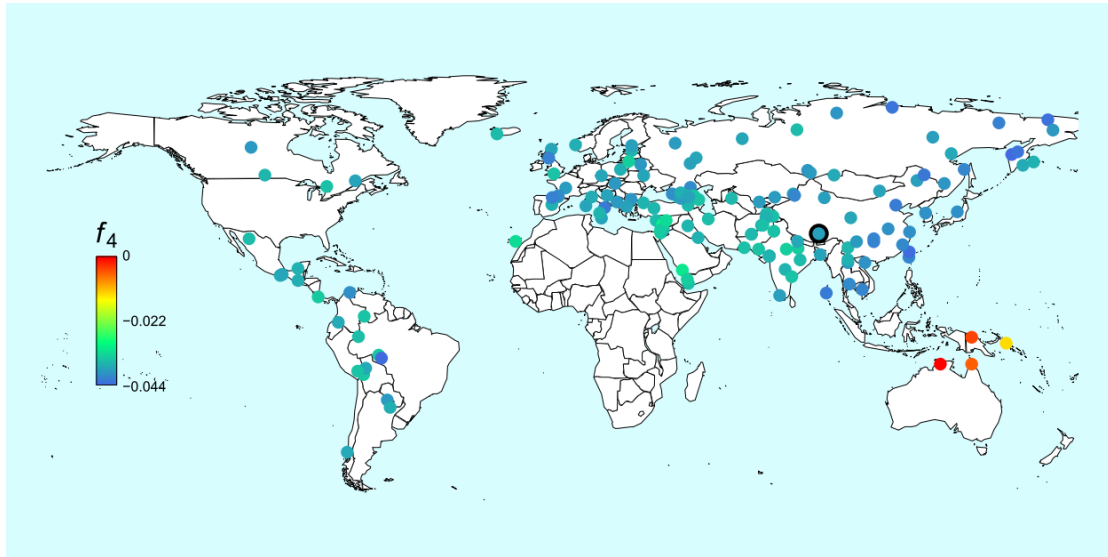

**Figure S15** Heat map of outgroup  $f_4$  statistics ( $D$ -test) testing for relatedness of non-African populations to Neanderthal and Denisovan.

The values showing here are based on computing  $f_4(\text{African}, X; \text{Neanderthal}, \text{Denisovan})$ , where  $X$  is a non-African population. A colder color indicates a more negative  $f_4$  value, which suggests greater derived allele sharing between population  $X$  and Neanderthal genome than that between  $X$  and Denisovan genome. TIB is highlighted with a black circle. For list of population labels, see [Table S4](#).



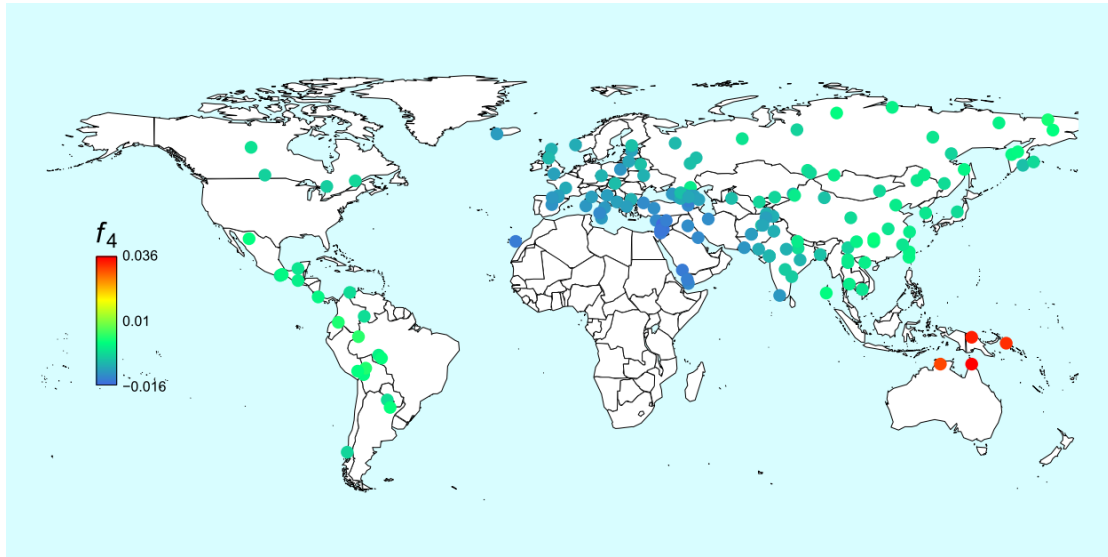

**Figure S16** Heat map of  $f_4$  statistics ( $D$ -test) testing for relatedness of Neanderthal to TIB and the other non-African populations.

The values showing here are based on computing  $f_4(\text{African}, \text{Neanderthal}; \text{TIB}, X)$ , where  $X$  is a non-African population. A warmer color indicates a more positive  $f_4$  value, which suggests greater derived allele sharing between population  $X$  and Neanderthal genome than that between TIB and Neanderthal. For list of population labels, see [Table S4](#).

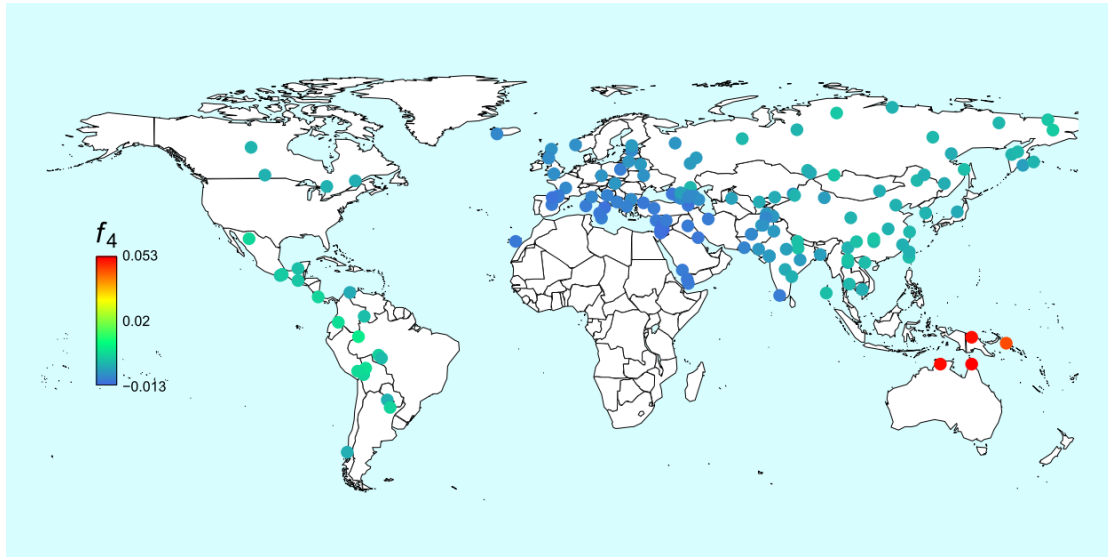

**Figure S17** Heat map of  $f_4$  statistics ( $D$ -test) testing for relatedness of Denisovan to TIB and the other non-African populations.

The values showing here are based on computing  $f_4(\text{African}, \text{Denisovan}; \text{TIB}, X)$ , where  $X$  is a non-African population. A warmer color indicates a more positive  $f_4$  value, which suggests greater derived allele sharing between population  $X$  and Denisovan genome than that between TIB and Denisovan. For list of population labels, see [Table S4](#).

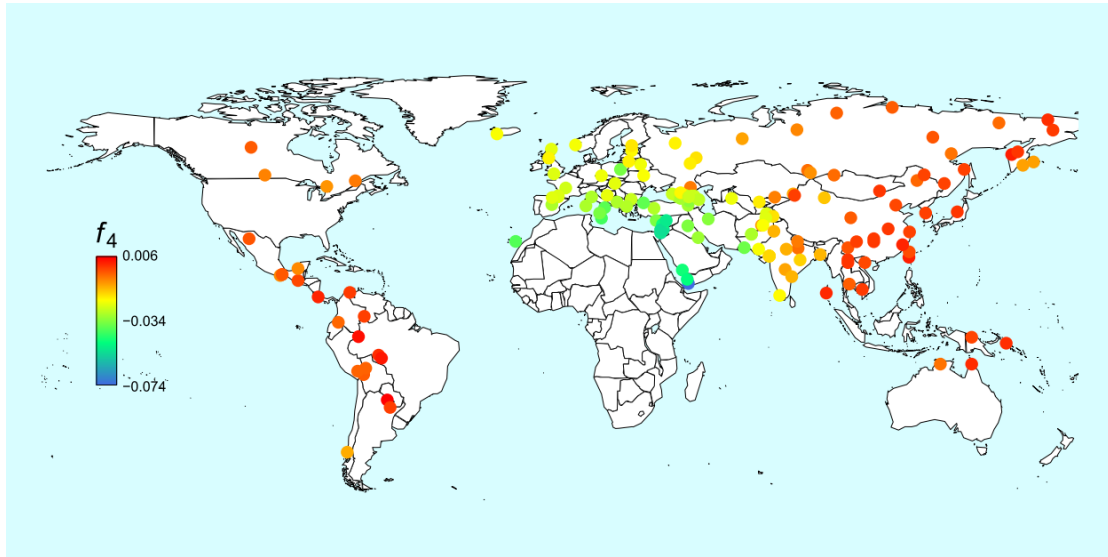

**Figure S18** Heat map of  $f_4$  statistics ( $D$ -test) testing for relatedness of Ust'-Ishim to TIB and the other non-African populations.

The values showing here are based on computing  $f_4(\text{African}, \text{Ust}'\text{-Ishim}; \text{TIB}, X)$ , where  $X$  is a non-African population. A warmer color indicates a more positive  $f_4$  value, which suggests greater derived allele sharing between population  $X$  and Ust'-Ishim genome than that between TIB and Ust'-Ishim. For list of population labels, see [Table S4](#).

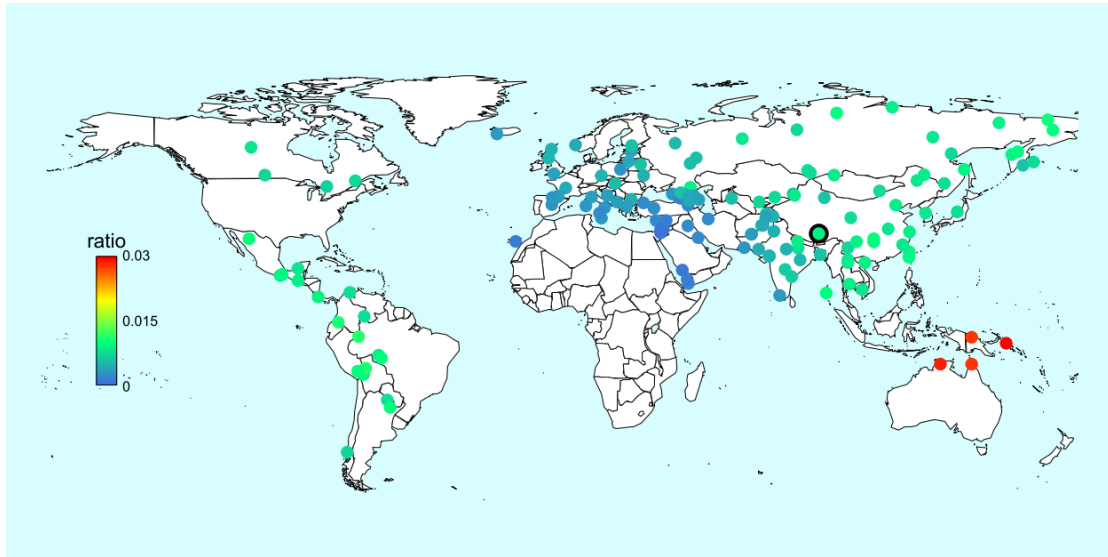

**Figure S19** Heat map of Neanderthal gene introgression ratio (based on Formula 1, see Material and Methods).

The graded heat key represents magnitude of Neanderthal gene introgression ratio, which is estimated by Formula 1. A warmer color indicates a higher ancient introgression level from Neanderthal. TIB is highlighted with a black circle. For list of population labels, see [Table S4](#).

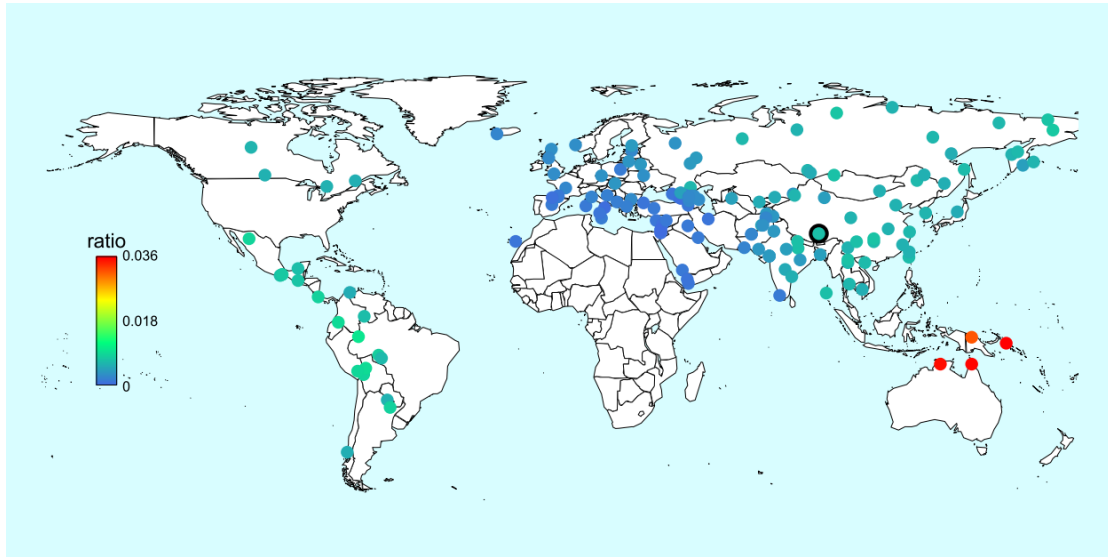

**Figure S20** Heat map of Denisovan gene introgression ratio (based on Formula 1, see Material and Methods).

The graded heat key represents magnitude of Denisovan gene introgression ratio, which is estimated by Formula 1. A warmer color means a higher ancient introgression level from Denisovan. TIB is highlighted with a black circle. For list of population labels, see [Table S4](#).

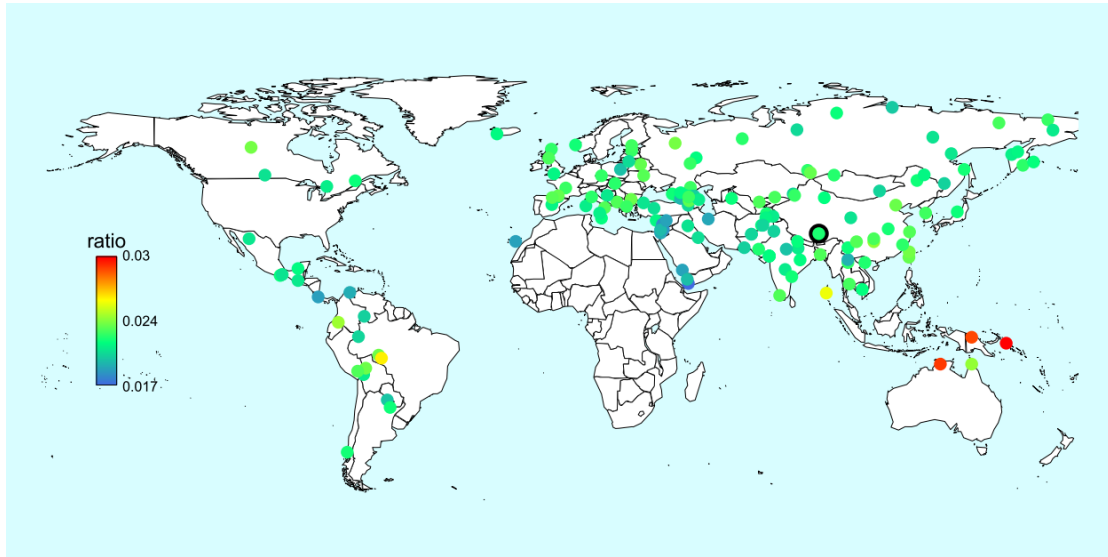

**Figure S21** Heat map of Neanderthal gene introgression ratio (based on Formula 2, see Material and Methods).

The graded heat key represents magnitude of Neanderthal gene introgression ratio, which is estimated by Formula 2. A warmer color means a higher ancient introgression level from Neanderthal. TIB is highlighted with a black circle. For list of population labels, see [Table S4](#).

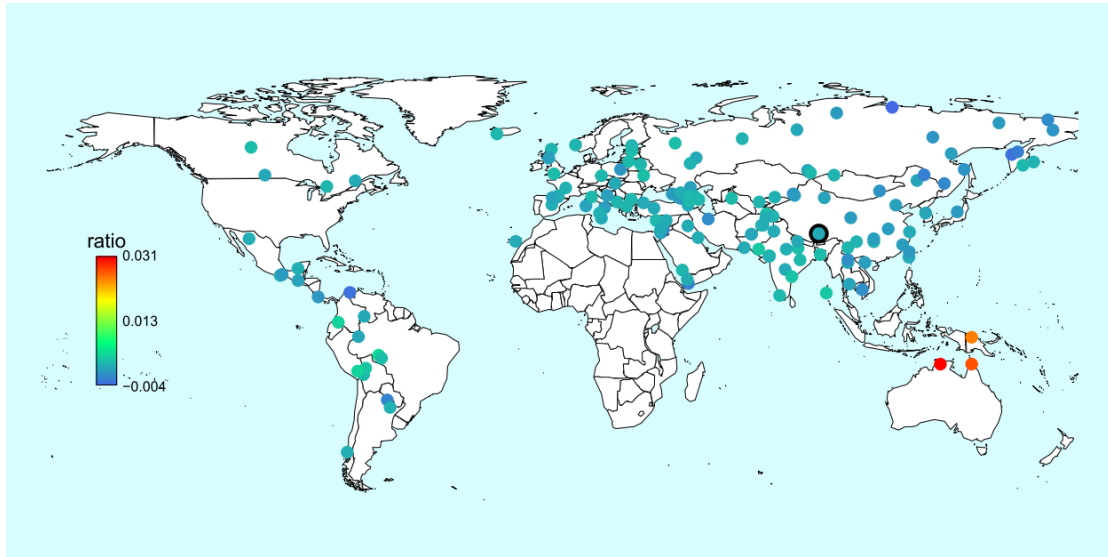

**Figure S22** Heat map of Denisovan gene introgression ratio (based on Formula 2, see Material and Methods).

The graded heat key represents magnitude of Denisovan gene introgression ratio, which is estimated by Formula 2. A warmer color means a higher ancient introgression level from Denisovan. TIB is highlighted with a black circle. For list of population labels, see [Table S4](#).

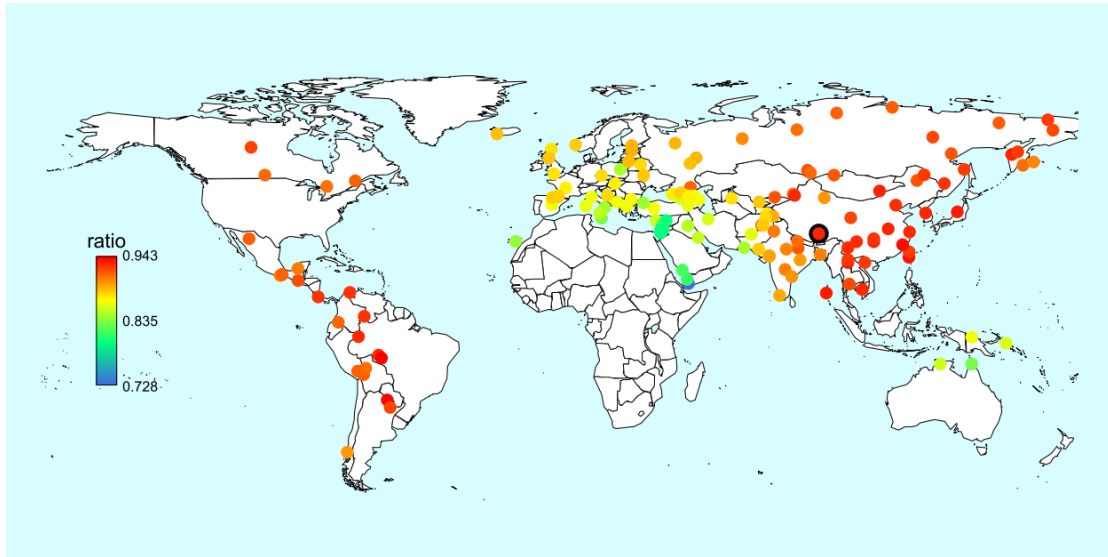

**Figure S23** Heat map of Ust'-Ishim gene introgression ratio (based on Formula 2, see Material and Methods).

The graded heat key represents magnitude of Ust'-Ishim gene introgression ratio, which is estimated by Formula 2. A warmer color means a higher ancient introgression level from Ust'-Ishim. TIB is highlighted with a black circle. For list of population labels, see [Table S4](#).



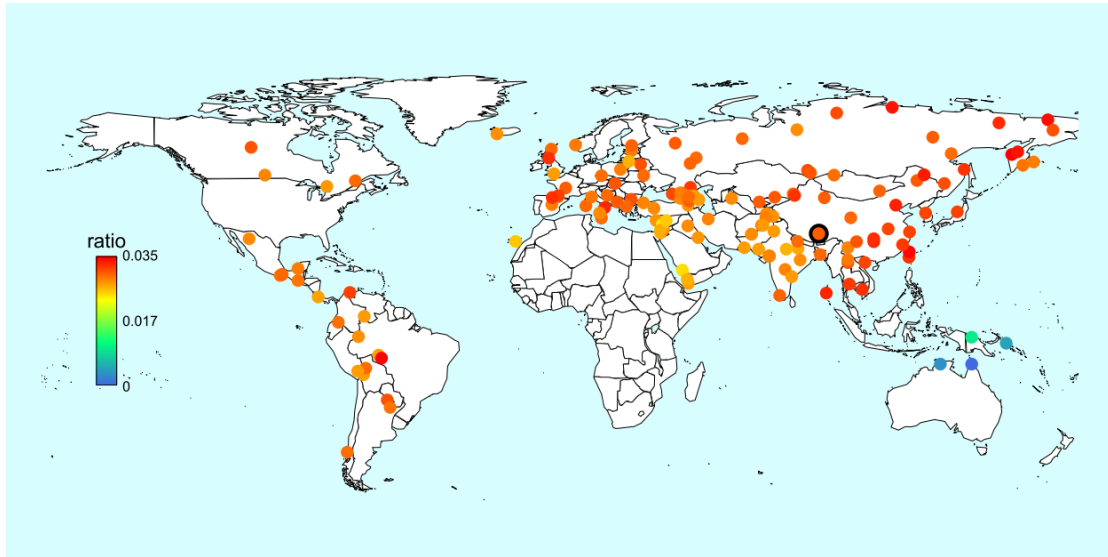

**Figure S24** Heat map of Neanderthal gene introgression ratio (based on Formula 3, see Material and Methods).

The graded heat key represents magnitude of Neanderthal gene introgression ratio, which is estimated by Formula 3. A warmer color means a higher ancient introgression level from Neanderthal. TIB is highlighted with a black circle. For list of population labels, see [Table S4](#).

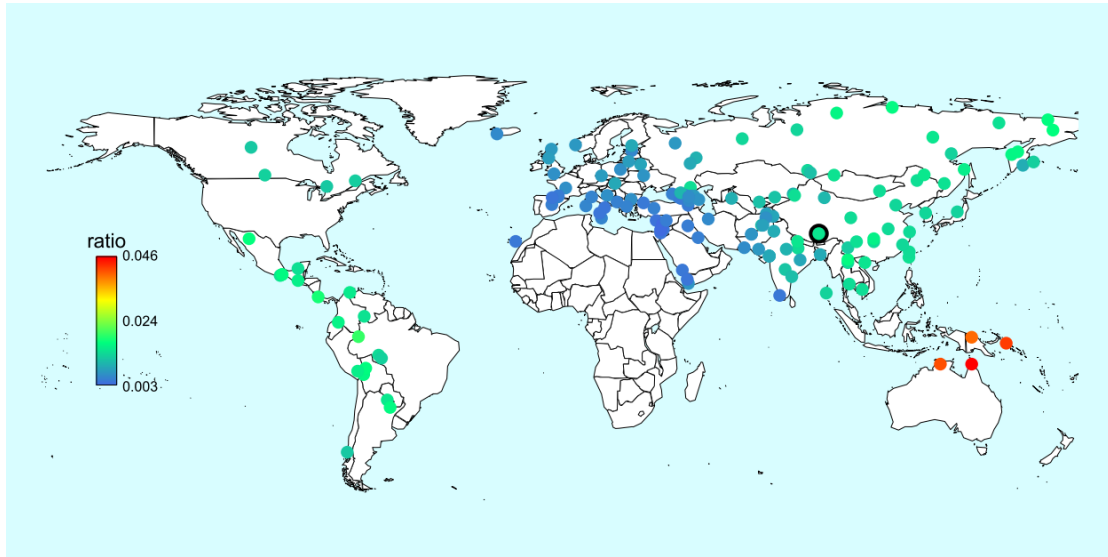

**Figure S25** Heat map of Neanderthal gene introgression ratio (based on Formula 4, see Material and Methods).

The graded heat key represents magnitude of Neanderthal gene introgression ratio, which is estimated by Formula 4. A warmer color means a higher ancient introgression level from Neanderthal. TIB is highlighted with a black circle. For list of population labels, see [Table S4](#).

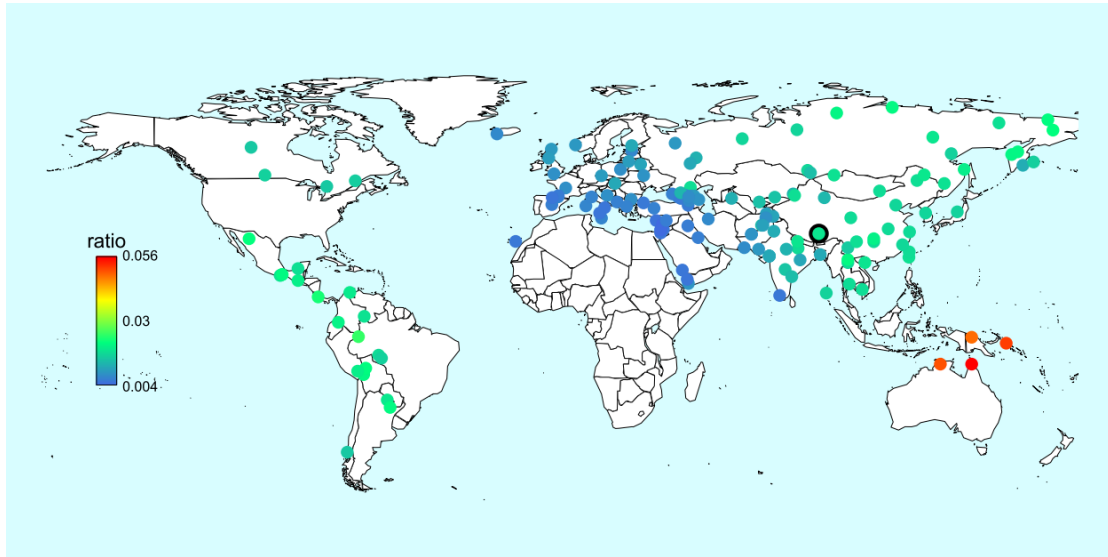

**Figure S26** Heat map of Denisovan gene introgression ratio (based on Formula 4, see Material and Methods).

The graded heat key represents magnitude of Denisovan gene introgression ratio, which is estimated by Formula 4. A warmer color means a higher ancient introgression level from Denisovan. TIB is highlighted with a black circle. For list of population labels, see [Table S4](#).

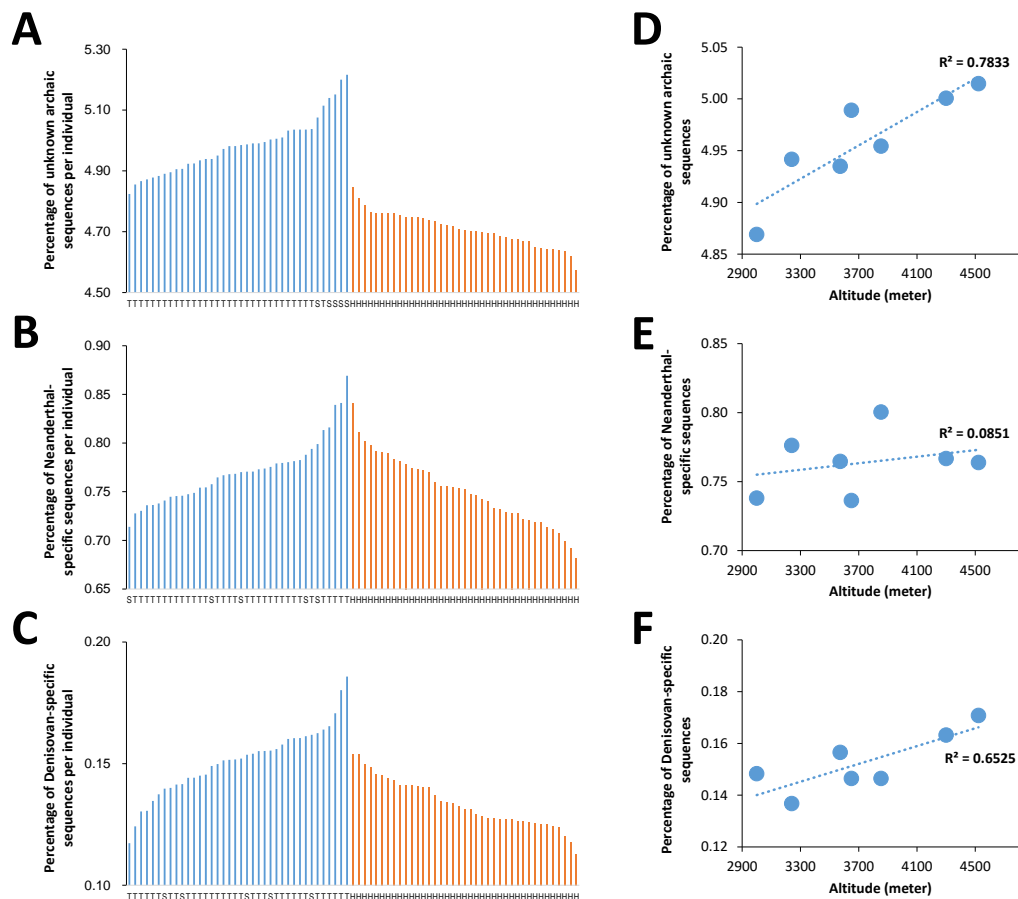

**Figure S27 Distribution of non-modern-human-specific sequences among individuals and correlation with altitude.** **a.** A comparison of the percentage of unknown non-modern human sequences per individual between TIB ( $4.98 \pm 0.09$ ) and HAN ( $4.71 \pm 0.06$ ) had significant differences ( $p < 10^{-5}$ , permutation test); **b.** A comparison of percentage of Neanderthal-specific sequences per individual between TIB ( $0.77 \pm 0.03$ ) and HAN ( $0.75 \pm 0.04$ ) had no significant differences ( $p = 0.01$ , permutation test); **c.** A comparison of the percentage of Denisovan-specific sequences per individual between TIB ( $0.15 \pm 0.01$ ) and HAN ( $0.13 \pm 0.01$ ) had slightly significant differences ( $p < 10^{-5}$ , permutation test); the statistical significance ( $p$  value) was obtained by permutation tests that were repeated 100,000 times; on the horizontal axis of **a**, **b**, and **c**, T denotes Tibetan, S for Sherpa, and H for Han Chinese; **d.** Correlation between the average proportion of unknown non-modern human sequences in regional Tibetan populations and altitude (Pearson  $R^2 = 0.783$ ;  $p = 0.019$ ); **e.** Correlation between the average proportion of Neanderthal-specific sequences per individual and altitude (Pearson  $R^2 = 0.085$ ;  $p = 0.575$ ); **f.** Correlation between the average proportion of Denisovan-specific sequences per individual and altitude (Pearson  $R^2 = 0.653$ ;  $p = 0.052$ ).

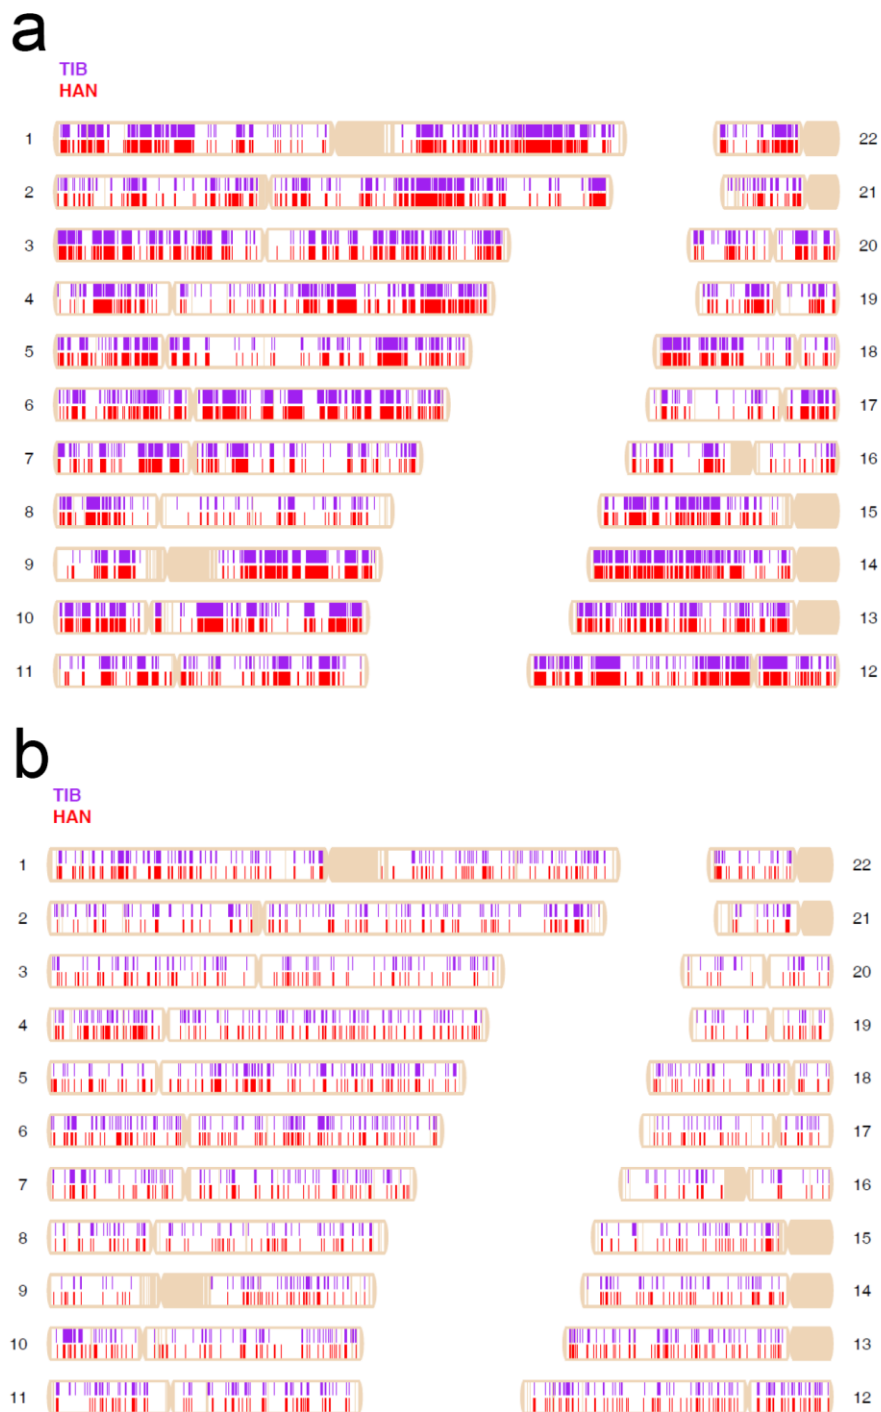

**Figure S28 Identified archaic lineages in the TIB and HAN genomes. a.** Spatial distributions of Neanderthal sequences in TIB and HAN. **b.** Spatial distributions of Denisovan sequences in TIB and HAN. Please note both panels (a and b) show results on population level, thus the positions indicated by purple and red colors represent an union of those observed in 38 TIB individuals and 39 HAN individuals, respectively.

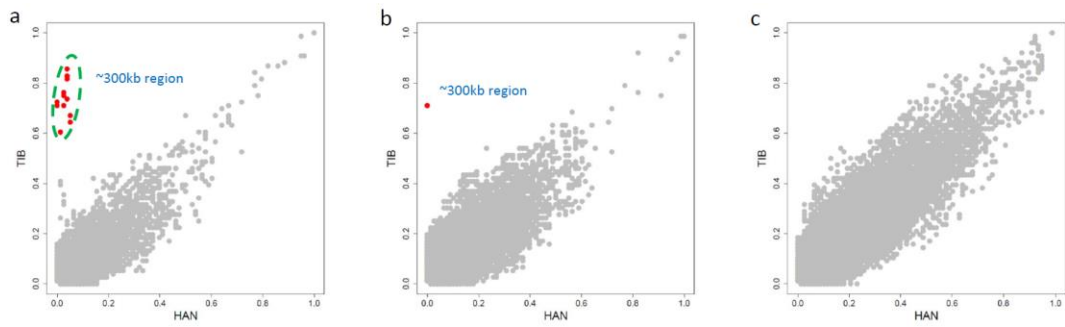

**Figure S29** Frequency distribution of ancient sequences in TIB and HAN. The ancient segments in TIB and HAN were detected by ArchaicSeeker and confirmed by other two methods (see [Material and Methods](#)). Each dot represents an ancient DNA segment with the frequency in TIB and HAN indicated by vertical and horizontal axis, respectively. Dots in red represent highly-differentiated segment between TIB and HAN (frequency difference larger than 0.4). a) Comparison of the frequency distribution of Denisovan-like sequences between TIB and HAN; the highly-differentiated segments enriched in the ~300kb *EPAS1* and its downstream region which encompass the 5-SNP-motif, *TED*, *TMEM247*, and other genes. b) Comparison of the frequency distribution of Neanderthal-like sequences between TIB and HAN; the highly-differentiated segment is also in the ~300kb region and its downstream. Neanderthal shared alleles with Denisovan in this segment. c) Comparison of the frequency distribution of Ust'-Ishim-like sequences between TIB and HAN; No highly-differentiated Ust'-Ishim-like segments were found between Tibetan and Han Chinese.
